# Supplementary material
Source: HighWire-hosted journal article supplement (https://www.jneurosci.org/highwire/filestream/597426/field_highwire_adjunct_files/2/supplementaryfigure3.pdf)
Supplement: supplementaryfigure3.pdf [file supplementaryfigure3.pdf]

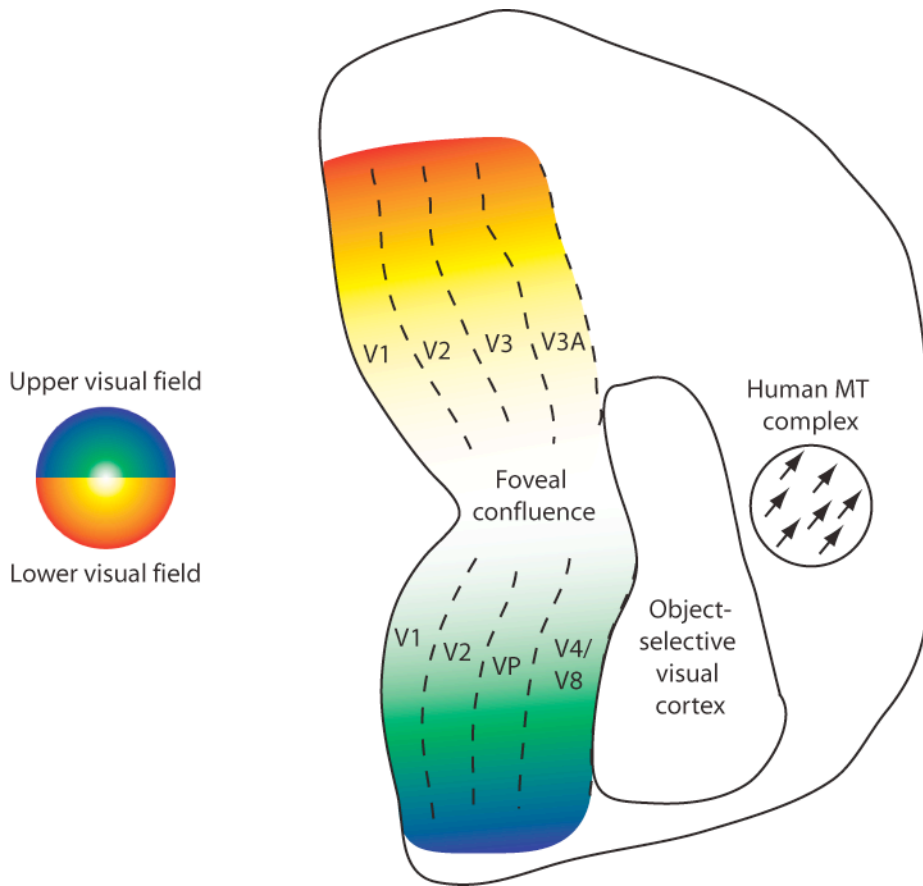

*Supplementary Figure 3.* Schematic diagram showing the typical organization of human visual cortex displayed on a flattened occipital cortex patch. based on previously published data (Malach et al., 1995; Sereno et al., 1995; DeYoe et al., 1996; Tootell et al., 1996; Engel et al., 1997; Tootell et al., 1997; Hasson et al., 2002; Malach et al., 2002; Dougherty et al., 2003; Hasson et al., 2003). The left edge of the patch corresponds to the fundus of the calcarine sulcus (where the cut was made to flatten the cortex). Object-selective visual cortex includes the Lateral Occipital Complex (Malach et al., 1995), the Fusiform Face Area (Kanwisher et al., 1997) and the Parahippocampal Place Area (Epstein and Kanwisher, 1998).

## References:

- DeYoe EA, Carman GJ, Bandettini P, Glickman S, Wieser J, Cox R, Miller D, Neitz J (1996) Mapping striate and extrastriate visual areas in human cerebral cortex. *Proc Natl Acad Sci U S A* 93:2382-2386.
- Dougherty RF, Koch VM, Brewer AA, Fischer B, Modersitzki J, Wandell BA (2003) Visual field representations and locations of visual areas V1/2/3 in human visual cortex. *J Vis* 3:586-598.
- Engel SA, Glover GH, Wandell BA (1997) Retinotopic organization in human visual cortex and the spatial precision of functional MRI. *Cereb Cortex* 7:181-192.
- Epstein R, Kanwisher N (1998) A cortical representation of the local visual environment. *Nature* 392:598-601.
- Hasson U, Harel M, Levy I, Malach R (2003) Large-scale mirror-symmetry organization of human occipito-temporal object areas. *Neuron* 37:1027-1041.
- Hasson U, Levy I, Behrmann M, Hendler T, Malach R (2002) Eccentricity bias as an organizing principle for human high-order object areas. *Neuron* 34:479-490.
- Kanwisher NG, McDermott J, Chun MM (1997) The fusiform face area: A module in human extrastriate cortex specialized for face perception. *Journal of Neuroscience* 17:4302-4311.
- Malach R, Levy I, Hasson U (2002) The topography of high-order human object areas. *Trends Cogn Sci* 6:176-184.
- Malach R, Reppas JB, Benson RR, Kwong KK, Jiang H, Kennedy WA, Ledden PJ, Brady TJ, Rosen BR, Tootell RB (1995) Object-related activity revealed by functional magnetic resonance imaging in human occipital cortex. *Proc Natl Acad Sci U S A* 92:8135-8139.
- Sereno MI, Dale AM, Reppas JB, Kwong KK, Belliveau JW, Brady TJ, Rosen BR, Tootell RB (1995) Borders of multiple visual areas in humans revealed by functional magnetic resonance imaging. *Science* 268:889-893.
- Tootell RB, Dale AM, Sereno MI, Malach R (1996) New images from human visual cortex. *Trends Neurosci* 19:481-489.
- Tootell RB, Mendola JD, Hadjikhani NK, Ledden PJ, Liu AK, Reppas JB, Sereno MI, Dale AM (1997) Functional analysis of V3A and related areas in human visual cortex. *J Neurosci* 17:7060-7078.
